# Supplementary material for: Controllable self-growth of a hydrogel with multiple membranes
Source: Royal Society of Chemistry journal article supplement (doi:10.1039/c3ra42129e), 2013-01-01
Supplement: c3ra42129e.pdf [file c3ra42129e.pdf]

## Controllable self-growth of hydrogel with multiple membranes

Pengyao Xing, Xiaoxiao Chu, Guangyan Du, Mingzhi Li, Jie Su, Aiyu Hao,\* Yuehui Hou, Shangyang Li, Mingfang Ma, Le Wu, Qiubing Yu

*School of Chemistry and Chemical Engineering and Key Laboratory of Colloid and Interface Chemistry of Ministry of Education, Shandong University, Jinan 250100, PR China.*

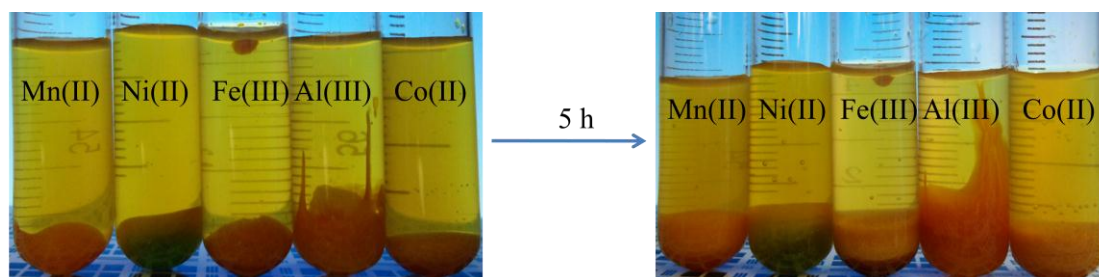

Figure S1. The growing behaviors of different TMIs,  $M_{\text{salts}} = 2 \text{ mmol}$ ,  $C_{\text{FA}} = 20 \text{ mM}$ , RT.

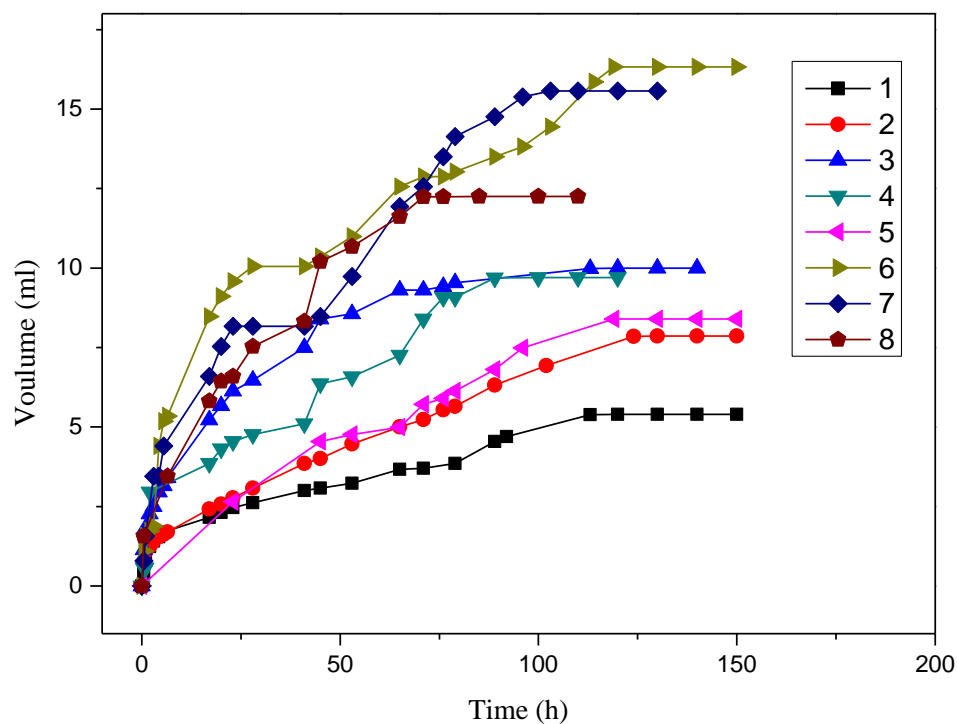

Figure S2. The growing courses of hydrogel under different concentration conditions with time changes which is listed in Table S1.

Concentrations of different gel for Fig. S2

| entry | C <sub>folate</sub> (mM) | M <sub>ZnCl2</sub> (g) |
|-------|--------------------------|------------------------|
| 1     | 10                       | 0.02                   |
| 2     | 20                       | 0.05                   |
| 3     | 20                       | 0.1                    |
| 4     | 40                       | 0.1                    |
| 5     | 60                       | 0.1                    |
| 6     | 20                       | 0.2                    |
| 7     | 40                       | 0.2                    |
| 8     | 60                       | 0.2                    |

Table S1 Results of different metal ions as the hydrogel inducers.

| Cations                      | State       |
|------------------------------|-------------|
| Zn <sup>II</sup>             | Gel         |
| Cu <sup>II</sup>             | Gel         |
| Ba <sup>II</sup>             | Precipitate |
| Mn <sup>II</sup>             | Gel         |
| Cd <sup>II</sup>             | Gel         |
| Fe <sup>III</sup>            | Gel         |
| Co <sup>II</sup>             | Gel         |
| NH <sub>4</sub> <sup>+</sup> | Solution    |
| Al <sup>III</sup>            | Gel         |
| Ni <sup>II</sup>             | Gel         |
| Mg <sup>II</sup>             | Precipitate |

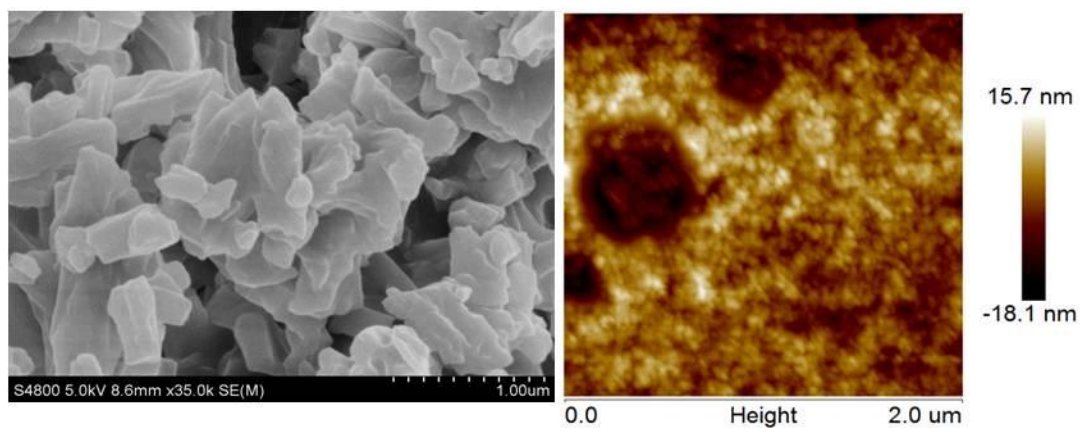

Figure S3 Images of FA solution without adding TMIs under SEM, AFM observations, respectively,  $C_{FA}=60$  mmol/L, dried under vacuum conditions.

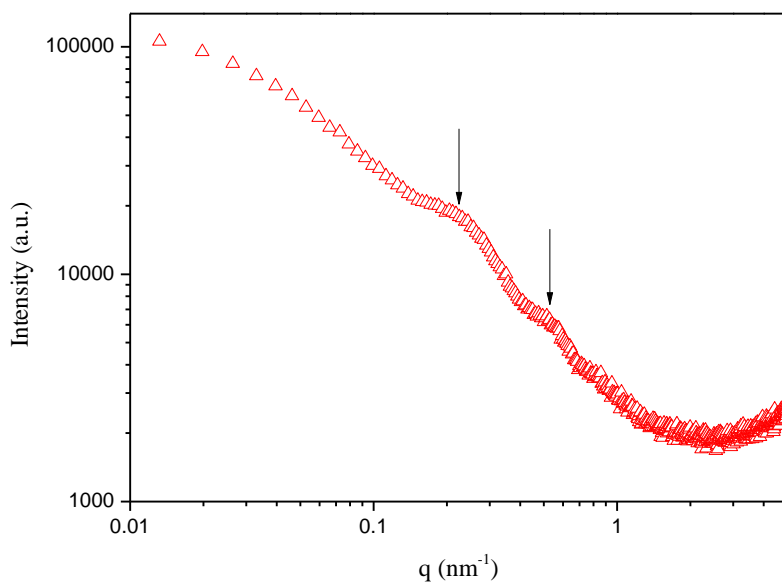

Figure S4 Small-angle X-ray scattering (SAXS) pattern of gel,  $M_{salts}=2$  mmol,  $C_{FA}=20$  mM, RT.
